# Supplementary material for: Role of Wnt11 during Osteogenic Differentiation of Human Mesenchymal Stem Cells on Microstructured Titanium Surfaces
Source: PubMed Central journal article supplement (PMC5988747; doi:10.1038/s41598-018-26901-8), 2018-06-05
Supplement: 41598_2018_26901_MOESM1_ESM.pdf [file 41598_2018_26901_MOESM1_ESM.pdf]

**Journal:** Scientific Reports

**Title:** Role of Wnt11 during Osteogenic Differentiation of Human Mesenchymal Stem Cells on Microstructured Titanium Surfaces

**Authors:** Barbara D. Boyan<sup>1,2,\*</sup>, Rene Olivares-Navarrete<sup>1</sup>, Michael B. Berger<sup>1</sup>, Sharon L. Hyzy<sup>1</sup>, Zvi Schwartz<sup>1,3</sup>

**Affiliations:**

<sup>1</sup>Department of Biomedical Engineering, School of Engineering, Virginia Commonwealth University, Richmond VA 23284, USA

<sup>2</sup>Wallace H. Coulter Department of Biomedical Engineering, Georgia Institute of Technology, Atlanta, GA 30332, USA

<sup>3</sup>Department of Periodontics, University of Texas Health Science Center at San Antonio, San Antonio, Texas 78229, USA

## SUPPLEMENTAL INFORMATION

Supplemental Table 1. Primer sequences used for Real-time PCR analysis of gene expression.

| <b>Gene</b> | <b>Primer Sequence</b> |                                 | <b>Accession Number</b> |
|-------------|------------------------|---------------------------------|-------------------------|
| GAPDH       | F                      | GCT CTC CAG AAC ATC ATC C       | NM_002046.3             |
|             | R                      | TGC TTC ACC ACC TTC TTG         |                         |
| RUNX2       | F                      | GTC TCA CTG CCT CTC ACT TG      | NM_001024630            |
|             | R                      | CAC ACA TCT CCT CCC TTC TG      |                         |
| COL1A1      | F                      | GAC CTC TCT CCT CTG AAA CC      | NM_000088.3             |
|             | R                      | AAC TGC TTT GTG CTT TGG G       |                         |
| ALP         | F                      | TGT GGA GTA TGA GAG TGA CG      | NM_000478.3             |
|             | R                      | GAA GTG GGA GTG CTT GTA TC      |                         |
| BGLAP       | F                      | GTG ACG AGT TGG CTG ACC         | NM_199173               |
|             | R                      | TGG AGA GGA GCA GAA CTG G       |                         |
| ITGB1       | F                      | ATT ACT CAG ATC CAA CCA C       | NM_002211               |
|             | R                      | TCC TCC TCA TTT CAT TCA TC      |                         |
| WNT 3A      | F                      | GTC CCG TCC CTC CCT TTC         | NM_033131               |
|             | R                      | ACC TCT CTT CCT ACC TTT CCC     |                         |
| WNT5A       | F                      | TCT CAG CCC AAG CAA CAA GG      | NM_003392               |
|             | R                      | GCC AGC ATC ACA TCA CAA CAC     |                         |
| WNT11       | F                      | GCT GTA TGA AAT AAT GCT GAG TGA | NM_004626.2             |
|             | R                      | GCC GAG TTC ACT TGA CGA G       |                         |

|       |   |                           |             |
|-------|---|---------------------------|-------------|
| ITGA1 | F | CACTCGTAAATGCCAAGAAAAG    | NM_181501.1 |
|       | R | TAGAACCCAACACAAAGATGC     |             |
| ITGA2 | F | ACT GTT CAA GGA GGA GAC   | NM_002203   |
|       | R | GGT CAA AGG CTT GTT TAG G |             |
| ITGA5 | F | ATC TGT GTG CCT GAC CTG   | NM_002205   |
|       | R | AAG TTC CCT GGG TGT CTG   |             |
